# Supplementary material for: Trends for Readmission and Mortality After Heart Failure Hospitalisation in Malaysia, 2007 to 2016
Source: PubMed Central journal article supplement (PMC8916062; doi:10.5334/gh.1108), 2022-03-08
Supplement: gh-17-1-1108-s1.pdf [file gh-17-1-1108-s1.pdf]

Rate (95% CI)      18.1   17.8-18.3                      5.3   5.1-5.4                      11.2   11.0-11.4                      33.2   32.9-33.4

Supplementary table 42. Multivariable Poisson regression analysis for 30-day readmission, in-hospital, 30-day and 1-year mortality rates with interaction term between time and ethnicity to determine statistical significance of trend differences by ethnicity

|               | <u>30-days readmission</u> |             |                | <u>In-hospital mortality</u> |             |                | <u>30-days mortality</u> |             |                | <u>1-year mortality</u> |             |                |
|---------------|----------------------------|-------------|----------------|------------------------------|-------------|----------------|--------------------------|-------------|----------------|-------------------------|-------------|----------------|
|               | <i>Rate ratio</i>          | <i>CI</i>   | <i>p</i>       | <i>Rate ratio</i>            | <i>CI</i>   | <i>p</i>       | <i>Rate ratio</i>        | <i>CI</i>   | <i>p</i>       | <i>Rate ratio</i>       | <i>CI</i>   | <i>p</i>       |
| (Intercept)   | 0.16                       | 0.15 – 0.17 | < <b>0.001</b> | 0.06                         | 0.06 – 0.07 | < <b>0.001</b> | 0.11                     | 0.10 – 0.12 | < <b>0.001</b> | 0.30                    | 0.29 – 0.31 | < <b>0.001</b> |
| Time          | 1.02                       | 1.01 – 1.02 | < <b>0.001</b> | 0.93                         | 0.91 – 0.94 | < <b>0.001</b> | 0.97                     | 0.96 – 0.97 | < <b>0.001</b> | 1.00                    | 0.99 – 1.00 | 0.231          |
| Time: Chinese | 1.00                       | 0.98 – 1.01 | 0.578          | 1.01                         | 0.99 – 1.04 | 0.349          | 1.00                     | 0.99 – 1.02 | 0.858          | 1.00s                   | 0.99 – 1.01 | 0.738          |
| Time: Indian  | 1.00                       | 0.98 – 1.02 | 0.924          | 0.98                         | 0.94 – 1.01 | 0.195          | 0.99                     | 0.97 – 1.02 | 0.504          | 1.01                    | 1.00 – 1.03 | <b>0.010</b>   |
| Time: Others  | 1.03                       | 1.01 – 1.05 | <b>0.002</b>   | 1.00                         | 0.98 – 1.03 | 0.920          | 0.98                     | 0.97 – 1.00 | 0.091          | 0.99                    | 0.98 – 1.00 | <b>0.021</b>   |
| Malay         | <i>Reference</i>           |             |                |                              |             |                |                          |             |                |                         |             |                |
| Chinese       | 1.14                       | 1.05 – 1.24 | <b>0.002</b>   | 1.14                         | 0.98 – 1.31 | 0.089          | 1.07                     | 0.97 – 1.18 | 0.155          | 0.96                    | 0.91 – 1.01 | 0.156          |

|        |                  |             |                  |      |             |                  |      |             |                  |      |             |                  |
|--------|------------------|-------------|------------------|------|-------------|------------------|------|-------------|------------------|------|-------------|------------------|
| Indian | 1.11             | 1.01 – 1.23 | <b>0.038</b>     | 0.93 | 0.75 – 1.14 | 0.474            | 0.83 | 0.73 – 0.96 | <b>0.010</b>     | 0.80 | 0.74 – 0.86 | <b>&lt;0.001</b> |
| Others | 0.68             | 0.60 – 0.77 | <b>&lt;0.001</b> | 1.90 | 1.63 – 2.22 | <b>&lt;0.001</b> | 1.42 | 1.26 – 1.59 | <b>&lt;0.001</b> | 1.03 | 0.96 – 1.11 | 0.369            |
| Female | <i>Reference</i> |             |                  |      |             |                  |      |             |                  |      |             |                  |
| Male   | 1.16             | 1.13 – 1.19 | <b>&lt;0.001</b> | 1.02 | 0.97 – 1.08 | 0.429            | 1.11 | 1.07 – 1.15 | <b>&lt;0.001</b> | 1.17 | 1.15 – 1.19 | <b>&lt;0.001</b> |
| 60-<65 | <i>Reference</i> |             |                  |      |             |                  |      |             |                  |      |             |                  |
| 20-<25 | 1.14             | 0.94 – 1.37 | 0.167            | 2.49 | 1.88 – 3.22 | <b>&lt;0.001</b> | 1.73 | 1.40 – 2.11 | <b>&lt;0.001</b> | 0.98 | 0.85 – 1.12 | 0.759            |
| 25-<30 | 1.01             | 0.86 – 1.17 | 0.918            | 2.62 | 2.12 – 3.21 | <b>&lt;0.001</b> | 1.75 | 1.48 – 2.04 | <b>&lt;0.001</b> | 0.99 | 0.89 – 1.10 | 0.884            |
| 30-<35 | 0.83             | 0.72 – 0.95 | <b>0.008</b>     | 2.00 | 1.64 – 2.43 | <b>&lt;0.001</b> | 1.39 | 1.20 – 1.61 | <b>&lt;0.001</b> | 0.86 | 0.78 – 0.94 | <b>0.002</b>     |
| 35-<40 | 0.98             | 0.88 – 1.08 | 0.654            | 1.25 | 1.01 – 1.53 | <b>0.034</b>     | 1.09 | 0.95 – 1.25 | 0.224            | 0.83 | 0.76 – 0.89 | <b>&lt;0.001</b> |
| 40-<45 | 0.95             | 0.87 – 1.03 | 0.195            | 1.15 | 0.96 – 1.36 | 0.115            | 0.99 | 0.88 – 1.10 | 0.796            | 0.83 | 0.78 – 0.88 | <b>&lt;0.001</b> |
| 45-<50 | 0.94             | 0.88 – 1.01 | 0.078            | 0.88 | 0.75 – 1.02 | 0.089            | 0.84 | 0.76 – 0.93 | <b>0.001</b>     | 0.82 | 0.78 – 0.87 | <b>&lt;0.001</b> |
| 50-<55 | 0.99             | 0.93 – 1.05 | 0.696            | 0.84 | 0.74 – 0.96 | <b>0.013</b>     | 0.82 | 0.75 – 0.89 | <b>&lt;0.001</b> | 0.87 | 0.83 – 0.91 | <b>&lt;0.001</b> |
| 55-<60 | 0.98             | 0.93 – 1.03 | 0.463            | 0.93 | 0.83 – 1.05 | 0.253            | 0.90 | 0.83 – 0.97 | <b>0.005</b>     | 0.93 | 0.90 – 0.96 | <b>&lt;0.001</b> |

|              |         |             |                  |          |             |                  |          |             |                  |         |             |                  |
|--------------|---------|-------------|------------------|----------|-------------|------------------|----------|-------------|------------------|---------|-------------|------------------|
| 65-<70       | 0.97    | 0.92 – 1.02 | 0.215            | 1.07     | 0.96 – 1.20 | 0.220            | 1.08     | 1.01 – 1.15 | <b>0.033</b>     | 1.05    | 1.01 – 1.09 | <b>0.006</b>     |
| 70-<75       | 0.91    | 0.87 – 0.96 | <b>0.001</b>     | 1.14     | 1.02 – 1.27 | <b>0.020</b>     | 1.23     | 1.15 – 1.31 | <b>&lt;0.001</b> | 1.15    | 1.12 – 1.20 | <b>&lt;0.001</b> |
| 75-<80       | 0.86    | 0.81 – 0.91 | <b>&lt;0.001</b> | 1.25     | 1.12 – 1.40 | <b>&lt;0.001</b> | 1.34     | 1.25 – 1.44 | <b>&lt;0.001</b> | 1.24    | 1.19 – 1.28 | <b>&lt;0.001</b> |
| 80-<85       | 0.84    | 0.79 – 0.90 | <b>&lt;0.001</b> | 1.53     | 1.35 – 1.73 | <b>&lt;0.001</b> | 1.59     | 1.47 – 1.71 | <b>&lt;0.001</b> | 1.37    | 1.31 – 1.43 | <b>&lt;0.001</b> |
| 85+          | 0.75    | 0.68 – 0.81 | <b>&lt;0.001</b> | 1.84     | 1.61 – 2.10 | <b>&lt;0.001</b> | 1.94     | 1.79 – 2.11 | <b>&lt;0.001</b> | 1.59    | 1.52 – 1.66 | <b>&lt;0.001</b> |
| Observations | 999     |             |                  | 1111     |             |                  | 1111     |             |                  | 1111    |             |                  |
| Deviance     | 894.324 |             |                  | 1299.643 |             |                  | 1114.947 |             |                  | 890.756 |             |                  |

Supplementary table 32. Poisson model for cardiovascular and non-cardiovascular death at one year after index HF admission

| <i>Predictors</i> | <b>Cardiovascular death</b> |             |                  | <b>Non-cardiovascular death</b> |             |                  |
|-------------------|-----------------------------|-------------|------------------|---------------------------------|-------------|------------------|
|                   | <i>Rate Ratio</i>           | <i>CI</i>   | <i>p</i>         | <i>Rate Ratio</i>               | <i>CI</i>   | <i>p</i>         |
| (Intercept)       | 0.10                        | 0.09 – 0.11 | <b>&lt;0.001</b> | 0.08                            | 0.08 – 0.09 | <b>&lt;0.001</b> |
| Time              | 0.98                        | 0.97 – 0.99 | <b>0.001</b>     | 1.02                            | 1.01 – 1.03 | <b>0.003</b>     |
| Female            | <i>Reference</i>            |             |                  |                                 |             |                  |
| Male              | 1.21                        | 1.16 – 1.26 | <b>&lt;0.001</b> | 1.09                            | 1.04 – 1.14 | <b>0.001</b>     |
| Malay             | <i>Reference</i>            |             |                  |                                 |             |                  |
| Chinese           | 1.10                        | 1.04 – 1.16 | <b>0.001</b>     | 1.14                            | 1.08 – 1.21 | <b>&lt;0.001</b> |
| Indian            | 1.07                        | 1.00 – 1.14 | 0.063            | 1.03                            | 0.95 – 1.11 | 0.496            |
| Others            | 1.12                        | 1.04 – 1.20 | <b>0.002</b>     | 1.17                            | 1.08 – 1.26 | <b>&lt;0.001</b> |
| 60-<65            | <i>Reference</i>            |             |                  |                                 |             |                  |

|        |      |             |                  |      |             |                  |
|--------|------|-------------|------------------|------|-------------|------------------|
| 20-<25 | 1.56 | 1.13 – 2.08 | <b>0.005</b>     | 1.87 | 1.38 – 2.48 | <b>&lt;0.001</b> |
| 25-<30 | 1.59 | 1.30 – 1.93 | <b>&lt;0.001</b> | 1.72 | 1.37 – 2.13 | <b>&lt;0.001</b> |
| 30-<35 | 1.15 | 0.94 – 1.39 | 0.161            | 1.47 | 1.21 – 1.78 | <b>&lt;0.001</b> |
| 35-<40 | 1.14 | 0.97 – 1.34 | 0.109            | 1.20 | 1.00 – 1.43 | <b>0.049</b>     |
| 40-<45 | 1.06 | 0.93 – 1.20 | 0.382            | 0.93 | 0.80 – 1.08 | 0.333            |
| 45-<50 | 0.92 | 0.82 – 1.02 | 0.110            | 0.83 | 0.74 – 0.94 | <b>0.003</b>     |
| 50-<55 | 0.95 | 0.87 – 1.04 | 0.291            | 0.88 | 0.79 – 0.97 | <b>0.011</b>     |
| 55-<60 | 1.00 | 0.92 – 1.08 | 0.905            | 0.93 | 0.85 – 1.02 | 0.146            |
| 65-<70 | 1.02 | 0.94 – 1.10 | 0.657            | 0.96 | 0.88 – 1.05 | 0.408            |
| 70-<75 | 1.10 | 1.01 – 1.18 | <b>0.020</b>     | 0.98 | 0.90 – 1.07 | 0.672            |
| 75-<80 | 1.08 | 0.99 – 1.17 | 0.074            | 1.08 | 0.98 – 1.18 | 0.109            |
| 80-<85 | 1.07 | 0.97 – 1.18 | 0.162            | 1.12 | 1.01 – 1.24 | <b>0.032</b>     |
| 85+    | 1.10 | 0.98 – 1.23 | 0.109            | 1.20 | 1.07 – 1.36 | <b>0.003</b>     |

---

|                           |       |       |
|---------------------------|-------|-------|
| Observations              | 686   | 678   |
| R <sup>2</sup> Nagelkerke | 0.277 | 0.299 |

Supplementary table 43. Comparison on causes of death between 2007-2008 and 2012-2013

| Cause of death                           | <u>2007-2008</u> |                | <u>2012-2013</u> |                |
|------------------------------------------|------------------|----------------|------------------|----------------|
|                                          | n                | % <sup>†</sup> | n                | % <sup>†</sup> |
| <b>Cardiovascular</b>                    | <b>2311</b>      | <b>60%</b>     | <b>1955</b>      | <b>53.5%</b>   |
| HF + cardiomyopathy                      | 956              | 24.8%          | 722              | 19.8%          |
| Other ischaemic heart diseases           | 693              | 18.0%          | 590              | 16.1%          |
| Other diseases of the circulatory system | 263              | 6.8%           | 189              | 5.2%           |
| Acute myocardial infarction              | 179              | 4.6%           | 210              | 5.7%           |
| Stroke                                   | 146              | 3.8%           | 171              | 4.7%           |
| Valvular heart disease                   | 74               | 1.9%           | 73               | 2.0%           |
| <b>Non-cardiovascular</b>                | <b>1541</b>      | <b>40%</b>     | <b>1699</b>      | <b>46.5%</b>   |
| Infection                                | 519              | 13.5%          | 797              | 21.8%          |
| Other‡                                   | 464              | 12.0%          | 488              | 13.4%          |
| Renal failure                            | 140              | 3.6%           | 107              | 2.9%           |
| Respiratory disease                      | 237              | 6.2%           | 189              | 5.2%           |
| Neoplasm                                 | 108              | 2.8%           | 87               | 2.4%           |
| Diabetes mellitus and complications      | 73               | 1.9%           | 31               | 0.8%           |
| <b>Missing</b>                           | <b>2679</b>      |                | <b>2254</b>      |                |

<sup>†</sup>Percentages were calculated based on all known causes of death

<sup>‡</sup> includes shock (not elsewhere classified), other diseases of digestive system, other disorders of urinary system, chronic nephritic syndrome, hepatic failure (NEC), hydro-electrolytic disorders, trauma and other causes



Supplementary table 54. Multivariable Poisson regression analysis for readmission and mortality rates using incident HF hospitalisation definition of no prior admission in the past 1 year

| Predictors  | 30-days readmission   |             |        | In-hospital mortality |             |        | 30-days mortality     |             |        | 1-year mortality      |             |        |
|-------------|-----------------------|-------------|--------|-----------------------|-------------|--------|-----------------------|-------------|--------|-----------------------|-------------|--------|
|             | Incidence Rate Ratios | CI          | p      | Incidence Rate Ratios | CI          | p      | Incidence Rate Ratios | CI          | p      | Incidence Rate Ratios | CI          | p      |
| (Intercept) | 0.16                  | 0.15 – 0.17 | <0.001 | 0.06                  | 0.05 – 0.06 | <0.001 | 0.11                  | 0.10 – 0.11 | <0.001 | 0.30                  | 0.29 – 0.31 | <0.001 |
| Time        | 1.02                  | 1.01 – 1.03 | <0.001 | 0.93                  | 0.92 – 0.93 | <0.001 | 0.96                  | 0.96 – 0.97 | <0.001 | 1.00                  | 0.99 – 1.00 | 0.102  |
| Female      | <i>Reference</i>      |             |        | <i>Reference</i>      |             |        | <i>Reference</i>      |             |        | <i>Reference</i>      |             |        |
| Male        | 1.16                  | 1.13 – 1.20 | <0.001 | 1.02                  | 0.96 – 1.08 | 0.486  | 1.11                  | 1.07 – 1.15 | <0.001 | 1.17                  | 1.15 – 1.19 | <0.001 |
| Malay       | <i>Reference</i>      |             |        | <i>Reference</i>      |             |        | <i>Reference</i>      |             |        | <i>Reference</i>      |             |        |
| Chinese     | 1.11                  | 1.07 – 1.16 | <0.001 | 1.21                  | 1.12 – 1.30 | <0.001 | 1.08                  | 1.03 – 1.13 | 0.001  | 0.96                  | 0.93 – 0.98 | <0.001 |
| Indian      | 1.10                  | 1.05 – 1.15 | <0.001 | 0.82                  | 0.73 – 0.91 | <0.001 | 0.81                  | 0.76 – 0.86 | <0.001 | 0.88                  | 0.85 – 0.91 | <0.001 |
| Others      | 0.82                  | 0.78 – 0.87 | <0.001 | 1.92                  | 1.78 – 2.07 | <0.001 | 1.30                  | 1.23 – 1.37 | <0.001 | 0.96                  | 0.93 – 0.99 | 0.007  |
| 60-<65      | <i>Reference</i>      |             |        | <i>Reference</i>      |             |        | <i>Reference</i>      |             |        | <i>Reference</i>      |             |        |
| 20-<25      | 1.13                  | 0.92 – 1.36 | 0.228  | 2.54                  | 1.92 – 3.28 | <0.001 | 1.73                  | 1.40 – 2.11 | <0.001 | 0.98                  | 0.85 – 1.12 | 0.770  |
| 25-<30      | 0.99                  | 0.85 – 1.16 | 0.944  | 2.62                  | 2.12 – 3.21 | <0.001 | 1.74                  | 1.48 – 2.04 | <0.001 | 0.98                  | 0.88 – 1.09 | 0.775  |
| 30-<35      | 0.83                  | 0.72 – 0.96 | 0.012  | 2.03                  | 1.66 – 2.46 | <0.001 | 1.39                  | 1.20 – 1.60 | <0.001 | 0.86                  | 0.78 – 0.94 | 0.002  |
| 35-<40      | 0.95                  | 0.85 – 1.06 | 0.403  | 1.31                  | 1.07 – 1.59 | 0.008  | 1.11                  | 0.97 – 1.26 | 0.138  | 0.83                  | 0.77 – 0.89 | <0.001 |
| 40-<45      | 0.94                  | 0.86 – 1.02 | 0.148  | 1.17                  | 0.98 – 1.38 | 0.071  | 0.99                  | 0.88 – 1.10 | 0.840  | 0.83                  | 0.78 – 0.88 | <0.001 |
| 45-<50      | 0.94                  | 0.88 – 1.01 | 0.072  | 0.89                  | 0.76 – 1.03 | 0.126  | 0.84                  | 0.77 – 0.93 | <0.001 | 0.83                  | 0.79 – 0.87 | <0.001 |

|        |      |             |                  |      |             |                  |      |             |                  |      |             |                  |
|--------|------|-------------|------------------|------|-------------|------------------|------|-------------|------------------|------|-------------|------------------|
| 50-<55 | 1.00 | 0.94 – 1.06 | 0.996            | 0.87 | 0.76 – 0.99 | <b>0.032</b>     | 0.83 | 0.76 – 0.90 | <b>&lt;0.001</b> | 0.87 | 0.84 – 0.91 | <b>&lt;0.001</b> |
| 55-<60 | 0.99 | 0.93 – 1.04 | 0.592            | 0.96 | 0.85 – 1.08 | 0.485            | 0.91 | 0.84 – 0.98 | <b>0.010</b>     | 0.94 | 0.90 – 0.97 | <b>0.001</b>     |
| 65-<70 | 0.98 | 0.93 – 1.03 | 0.467            | 1.09 | 0.98 – 1.21 | 0.130            | 1.08 | 1.01 – 1.16 | <b>0.022</b>     | 1.05 | 1.02 – 1.09 | <b>0.004</b>     |
| 70-<75 | 0.92 | 0.87 – 0.97 | <b>0.003</b>     | 1.15 | 1.03 – 1.28 | <b>0.013</b>     | 1.22 | 1.14 – 1.30 | <b>&lt;0.001</b> | 1.15 | 1.11 – 1.19 | <b>&lt;0.001</b> |
| 75-<80 | 0.87 | 0.82 – 0.92 | <b>&lt;0.001</b> | 1.27 | 1.14 – 1.42 | <b>&lt;0.001</b> | 1.34 | 1.25 – 1.44 | <b>&lt;0.001</b> | 1.23 | 1.19 – 1.28 | <b>&lt;0.001</b> |
| 80-<85 | 0.86 | 0.80 – 0.92 | <b>&lt;0.001</b> | 1.54 | 1.36 – 1.73 | <b>&lt;0.001</b> | 1.58 | 1.46 – 1.70 | <b>&lt;0.001</b> | 1.36 | 1.31 – 1.42 | <b>&lt;0.001</b> |
| 85+    | 0.75 | 0.68 – 0.82 | <b>&lt;0.001</b> | 1.85 | 1.62 – 2.10 | <b>&lt;0.001</b> | 1.93 | 1.78 – 2.10 | <b>&lt;0.001</b> | 1.57 | 1.50 – 1.64 | <b>&lt;0.001</b> |

Supplementary table 65. Multivariable Poisson regression analysis for readmission and mortality rates using incident HF hospitalisation definition of no prior admission in the past 3 years

| <i>Predictors</i> | <b>30-days readmission</b>   |             |                  | <b>In-hospital mortality</b> |             |                  | <b>30-days mortality</b>     |             |                  | <b>1-year mortality</b>      |             |                  |
|-------------------|------------------------------|-------------|------------------|------------------------------|-------------|------------------|------------------------------|-------------|------------------|------------------------------|-------------|------------------|
|                   | <i>Incidence Rate Ratios</i> | <i>CI</i>   | <i>p</i>         | <i>Incidence Rate Ratios</i> | <i>CI</i>   | <i>p</i>         | <i>Incidence Rate Ratios</i> | <i>CI</i>   | <i>p</i>         | <i>Incidence Rate Ratios</i> | <i>CI</i>   | <i>p</i>         |
| (Intercept)       | 0.16                         | 0.15 – 0.17 | <b>&lt;0.001</b> | 0.06                         | 0.05 – 0.07 | <b>&lt;0.001</b> | 0.11                         | 0.10 – 0.12 | <b>&lt;0.001</b> | 0.29                         | 0.28 – 0.30 | <b>&lt;0.001</b> |
| Time              | 1.02                         | 1.01 – 1.03 | <b>&lt;0.001</b> | 0.92                         | 0.91 – 0.93 | <b>&lt;0.001</b> | 0.96                         | 0.96 – 0.97 | <b>&lt;0.001</b> | 1.00                         | 1.00 – 1.00 | 0.969            |
| Female            | <i>Reference</i>             |             |                  | <i>Reference</i>             |             |                  | <i>Reference</i>             |             |                  | <i>Reference</i>             |             |                  |
| Male              | 1.16                         | 1.13 – 1.20 | <b>&lt;0.001</b> | 1.02                         | 0.96 – 1.08 | 0.576            | 1.12                         | 1.08 – 1.16 | <b>&lt;0.001</b> | 1.17                         | 1.15 – 1.19 | <b>&lt;0.001</b> |

|         |                  |             |                |                  |             |                |                  |             |                |                  |             |                |
|---------|------------------|-------------|----------------|------------------|-------------|----------------|------------------|-------------|----------------|------------------|-------------|----------------|
| Malay   | <i>Reference</i> |             |                | <i>Reference</i> |             |                | <i>Reference</i> |             |                | <i>Reference</i> |             |                |
| Chinese | 1.11             | 1.07 – 1.15 | < <b>0.001</b> | 1.23             | 1.14 – 1.33 | < <b>0.001</b> | 1.10             | 1.04 – 1.15 | < <b>0.001</b> | 0.96             | 0.93 – 0.98 | <b>0.001</b>   |
| Indian  | 1.10             | 1.05 – 1.15 | < <b>0.001</b> | 0.80             | 0.71 – 0.90 | < <b>0.001</b> | 0.80             | 0.74 – 0.85 | < <b>0.001</b> | 0.86             | 0.83 – 0.89 | < <b>0.001</b> |
| Others  | 0.81             | 0.77 – 0.86 | < <b>0.001</b> | 1.91             | 1.76 – 2.07 | < <b>0.001</b> | 1.28             | 1.21 – 1.36 | < <b>0.001</b> | 0.94             | 0.91 – 0.98 | <b>0.001</b>   |
| 60-<65  | <i>Reference</i> |             |                | <i>Reference</i> |             |                | <i>Reference</i> |             |                | <i>Reference</i> |             |                |
| 20-<25  | 1.16             | 0.95 – 1.40 | 0.143          | 2.50             | 1.85 – 3.28 | < <b>0.001</b> | 1.78             | 1.42 – 2.19 | < <b>0.001</b> | 1.01             | 0.87 – 1.16 | 0.914          |
| 25-<30  | 1.00             | 0.85 – 1.17 | 0.967          | 2.72             | 2.18 – 3.37 | < <b>0.001</b> | 1.83             | 1.55 – 2.16 | < <b>0.001</b> | 1.03             | 0.92 – 1.15 | 0.612          |
| 30-<35  | 0.84             | 0.73 – 0.97 | <b>0.020</b>   | 2.01             | 1.63 – 2.47 | < <b>0.001</b> | 1.39             | 1.19 – 1.62 | < <b>0.001</b> | 0.87             | 0.78 – 0.95 | <b>0.004</b>   |
| 35-<40  | 0.97             | 0.87 – 1.08 | 0.607          | 1.22             | 0.97 – 1.51 | 0.083          | 1.08             | 0.93 – 1.25 | 0.299          | 0.82             | 0.75 – 0.89 | < <b>0.001</b> |
| 40-<45  | 0.94             | 0.86 – 1.03 | 0.166          | 1.14             | 0.95 – 1.36 | 0.166          | 0.98             | 0.86 – 1.10 | 0.697          | 0.83             | 0.77 – 0.88 | < <b>0.001</b> |
| 45-<50  | 0.95             | 0.88 – 1.02 | 0.126          | 0.88             | 0.75 – 1.03 | 0.121          | 0.84             | 0.76 – 0.93 | <b>0.001</b>   | 0.83             | 0.79 – 0.87 | < <b>0.001</b> |
| 50-<55  | 0.99             | 0.94 – 1.06 | 0.839          | 0.83             | 0.72 – 0.96 | <b>0.012</b>   | 0.81             | 0.74 – 0.89 | < <b>0.001</b> | 0.87             | 0.83 – 0.91 | < <b>0.001</b> |

|        |      |             |                  |      |             |                  |      |             |                  |      |             |                  |
|--------|------|-------------|------------------|------|-------------|------------------|------|-------------|------------------|------|-------------|------------------|
| 55-<60 | 0.98 | 0.93 – 1.04 | 0.521            | 0.94 | 0.83 – 1.07 | 0.366            | 0.90 | 0.83 – 0.98 | <b>0.013</b>     | 0.93 | 0.89 – 0.96 | <b>&lt;0.001</b> |
| 65-<70 | 0.97 | 0.92 – 1.02 | 0.237            | 1.09 | 0.97 – 1.22 | 0.161            | 1.08 | 1.00 – 1.16 | <b>0.042</b>     | 1.05 | 1.01 – 1.09 | <b>0.017</b>     |
| 70-<75 | 0.92 | 0.87 – 0.97 | <b>0.004</b>     | 1.14 | 1.01 – 1.28 | <b>0.028</b>     | 1.23 | 1.14 – 1.32 | <b>&lt;0.001</b> | 1.15 | 1.11 – 1.20 | <b>&lt;0.001</b> |
| 75-<80 | 0.87 | 0.82 – 0.93 | <b>&lt;0.001</b> | 1.23 | 1.09 – 1.39 | <b>0.001</b>     | 1.32 | 1.22 – 1.42 | <b>&lt;0.001</b> | 1.24 | 1.19 – 1.29 | <b>&lt;0.001</b> |
| 80-<85 | 0.85 | 0.79 – 0.92 | <b>&lt;0.001</b> | 1.55 | 1.36 – 1.77 | <b>&lt;0.001</b> | 1.59 | 1.46 – 1.72 | <b>&lt;0.001</b> | 1.37 | 1.31 – 1.43 | <b>&lt;0.001</b> |
| 85+    | 0.75 | 0.68 – 0.82 | <b>&lt;0.001</b> | 1.83 | 1.58 – 2.11 | <b>&lt;0.001</b> | 1.93 | 1.76 – 2.11 | <b>&lt;0.001</b> | 1.59 | 1.51 – 1.67 | <b>&lt;0.001</b> |

---
